# Supplementary material for: Decreased Gene Expression of Antiangiogenic Factors in Endometrial Cancer: qPCR Analysis and Machine Learning Modelling
Source: MDPI journal article supplement (doi:10.3390/cancers15143661), 2023-07-18
Supplement: s1 [file s1]

**Table S1:** Normalized expression of angiogenesis-associated genes in endometrial cancer tissues and adjacent control tissues. Endometrial cancer tissue, n= up to 548; adjacent control tissue, n= up to 35; paired samples, n= up to 23. Data are from the GDC TCGA Endometrioid Cancer (UCEC) study, downloaded from UCSC Xena server [1]. FC, fold change; FR, fold-regulation.

| GENE           | tissue | AVERAGE<br>(log2 value) | EXPRESSION<br>(antilog value) | FC<br>(tumor/normal) | FR<br>(tumor/normal) | p-value <sup>†</sup> |      | Adjusted<br>p-value <sup>‡</sup> |
|----------------|--------|-------------------------|-------------------------------|----------------------|----------------------|----------------------|------|----------------------------------|
| <b>ADAMTS1</b> | normal | 19.884                  | 967565.632                    | 0.2                  | <b>-4.2</b>          | <0.0001              | **** | 0.0092                           |
|                | tumor  | 17.808                  | 229433.889                    |                      |                      |                      |      |                                  |
| <b>AMOT</b>    | normal | 16.761                  | 111094.554                    | 0.8                  | <b>-1.2</b>          | 0.6811               | ns   | 1.0000                           |
|                | tumor  | 16.494                  | 92322.701                     |                      |                      |                      |      |                                  |
| <b>ANG</b>     | normal | 17.497                  | 184923.805                    | 0.4                  | <b>-2.5</b>          | 0.0024               | *    | 0.1983                           |
|                | tumor  | 16.193                  | 74896.438                     |                      |                      |                      |      |                                  |
| <b>ANGPT1</b>  | normal | 13.808                  | 14339.571                     | 0.2                  | <b>-5.0</b>          | <0.0001              | **** | 0.0092                           |
|                | tumor  | 11.491                  | 2878.010                      |                      |                      |                      |      |                                  |
| <b>ANGPT2</b>  | normal | 15.133                  | 35928.900                     | 1.4                  | <b>1.4</b>           | 0.1818               | ns   | 1.0000                           |
|                | tumor  | 15.590                  | 49315.816                     |                      |                      |                      |      |                                  |
| <b>ANGPT4</b>  | normal | 12.618                  | 6285.075                      | 0.0                  | <b>-20.0</b>         | 0.0001               | ***  | 0.0092                           |
|                | tumor  | 8.293                   | 313.577                       |                      |                      |                      |      |                                  |
| <b>ANGPTL1</b> | normal | 17.757                  | 221530.046                    | 0.0                  | <b>-42.0</b>         | <0.0001              | **** | 0.0092                           |
|                | tumor  | 12.366                  | 5279.936                      |                      |                      |                      |      |                                  |
| <b>ANGPTL2</b> | normal | 18.737                  | 437046.897                    | 0.4                  | <b>-2.5</b>          | 0.0053               | *    | 0.3867                           |
|                | tumor  | 17.416                  | 174899.651                    |                      |                      |                      |      |                                  |
| <b>ANGPTL3</b> | normal | 8.191                   | 292.284                       | 0.6                  | <b>-1.7</b>          | 0.8462               | ns   | 1.0000                           |
|                | tumor  | 7.439                   | 173.486                       |                      |                      |                      |      |                                  |
| <b>ANGPTL4</b> | normal | 16.188                  | 74672.309                     | 2.2                  | <b>2.2</b>           | 0.0010               | **   | 0.0879                           |
|                | tumor  | 17.294                  | 160743.159                    |                      |                      |                      |      |                                  |
| <b>CD44</b>    | normal | 19.461                  | 721465.773                    | 0.5                  | <b>-2.0</b>          | 0.0018               | *    | 0.1527                           |
|                | tumor  | 18.482                  | 366248.545                    |                      |                      |                      |      |                                  |
| <b>CDH5</b>    | normal | 17.758                  | 221661.702                    | 0.5                  | <b>-2.1</b>          | 0.0059               | *    | 0.4198                           |
|                | tumor  | 16.692                  | 105871.339                    |                      |                      |                      |      |                                  |
| <b>CEACAM1</b> | normal | 15.650                  | 51408.321                     | 2.1                  | <b>2.1</b>           | 0.0013               | *    | 0.1128                           |
|                | tumor  | 16.753                  | 110452.435                    |                      |                      |                      |      |                                  |
| <b>CHGA</b>    | normal | 13.658                  | 12929.945                     | 4.9                  | <b>4.9</b>           | 0.0903               | ns   | 0.9998                           |
|                | tumor  | 15.954                  | 63468.443                     |                      |                      |                      |      |                                  |
| <b>COL15A1</b> | normal | 18.769                  | 446583.811                    | 0.3                  | <b>-3.6</b>          | 0.0003               | **   | 0.0272                           |
|                | tumor  | 16.926                  | 124553.420                    |                      |                      |                      |      |                                  |
| <b>COL18A1</b> | normal | 19.830                  | 932019.103                    | 1.4                  | <b>1.4</b>           | 0.1445               | ns   | 1.0000                           |
|                | tumor  | 20.346                  | 1332877.847                   |                      |                      |                      |      |                                  |
| <b>COL4A1</b>  | normal | 19.460                  | 721037.259                    | 1.3                  | <b>1.3</b>           | 0.1375               | ns   | 1.0000                           |
|                | tumor  | 19.829                  | 931052.923                    |                      |                      |                      |      |                                  |
| <b>COL4A2</b>  | normal | 20.637                  | 1630470.765                   | 0.9                  | <b>-1.1</b>          | 0.5824               | ns   | 1.0000                           |
|                | tumor  | 20.482                  | 1464920.062                   |                      |                      |                      |      |                                  |
| <b>COL4A3</b>  | normal | 11.909                  | 3846.304                      | 0.3                  | <b>-3.5</b>          | 0.0021               | *    | 0.1759                           |
|                | tumor  | 10.088                  | 1088.272                      |                      |                      |                      |      |                                  |
| <b>CSF3</b>    | normal | 13.165                  | 9183.501                      | 0.4                  | <b>-2.2</b>          | 0.5399               | ns   | 1.0000                           |
|                | tumor  | 12.010                  | 4123.395                      |                      |                      |                      |      |                                  |
| <b>CXCL10</b>  | normal | 15.957                  | 63605.202                     | 3.6                  | <b>3.6</b>           | 0.0301               | *    | 0.9399                           |
|                | tumor  | 17.801                  | 228368.422                    |                      |                      |                      |      |                                  |
| <b>CXCL12</b>  | normal | 19.761                  | 888756.433                    | 0.1                  | <b>-16.8</b>         | <0.0001              | **** | 0.0092                           |
|                | tumor  | 15.690                  | 52854.045                     |                      |                      |                      |      |                                  |
| <b>CXCL2</b>   | normal | 16.282                  | 79668.086                     | 0.6                  | <b>-1.7</b>          | 0.0360               | *    | 0.9657                           |
|                | tumor  | 15.543                  | 47742.343                     |                      |                      |                      |      |                                  |
| <b>CXCL8</b>   | normal | 14.040                  | 16840.281                     | 4.4                  | <b>4.4</b>           | 0.0163               | *    | 0.7795                           |
|                | tumor  | 16.172                  | 73816.282                     |                      |                      |                      |      |                                  |
| <b>EDIL3</b>   | normal | 16.950                  | 126607.207                    | 0.2                  | <b>-4.8</b>          | 0.0006               | ***  | 0.0537                           |
|                | tumor  | 14.675                  | 26155.267                     |                      |                      |                      |      |                                  |
| <b>ENPP2</b>   | normal | 19.099                  | 561584.214                    | 0.2                  | <b>-5.9</b>          | <0.0001              | **** | 0.0092                           |
|                | tumor  | 16.534                  | 94865.434                     |                      |                      |                      |      |                                  |
| <b>EPHB2</b>   | normal | 14.342                  | 20766.925                     | 1.8                  | <b>1.8</b>           | 0.0475               | *    | 0.9886                           |
|                | tumor  | 15.188                  | 37333.766                     |                      |                      |                      |      |                                  |
| <b>F2</b>      | normal | 7.274                   | 154.803                       | 3.8                  | <b>3.8</b>           | 0.0462               | *    | 0.9871                           |
|                | tumor  | 9.184                   | 581.475                       |                      |                      |                      |      |                                  |
| <b>FBLN5</b>   | normal | 19.774                  | 896712.333                    | 0.2                  | <b>-4.7</b>          | <0.0001              | **** | 0.0092                           |
|                | tumor  | 17.533                  | 189668.482                    |                      |                      |                      |      |                                  |
| <b>FGA</b>     | normal | 5.820                   | 56.506                        | 1.2                  | <b>1.2</b>           | 0.4038               | ns   | 1.0000                           |
|                | tumor  | 6.110                   | 69.082                        |                      |                      |                      |      |                                  |
| <b>FGF1</b>    | normal | 14.245                  | 19410.793                     | 0.6                  | <b>-1.6</b>          | 0.1404               | ns   | 1.0000                           |
|                | tumor  | 13.560                  | 12078.374                     |                      |                      |                      |      |                                  |
| <b>FGF2</b>    | normal | 17.137                  | 144114.617                    | 0.1                  | <b>-17.5</b>         | <0.0001              | **** | 0.0092                           |

|               |        |        |              |      |             |         |      |        |
|---------------|--------|--------|--------------|------|-------------|---------|------|--------|
|               | tumor  | 13.011 | 8256.851     |      |             |         |      |        |
| <b>FGF4</b>   | normal | 1.657  | 3.153        | 17.6 | <b>17.6</b> | 0.0002  | **   | 0.0182 |
|               | tumor  | 5.797  | 55.601       |      |             |         |      |        |
| <b>FLT1</b>   | normal | 16.605 | 99668.994    | 0.6  | <b>-1.5</b> | 0.2861  | ns   | 1.0000 |
|               | tumor  | 15.981 | 64680.363    |      |             |         |      |        |
| <b>FLT4</b>   | normal | 16.689 | 105665.351   | 0.2  | <b>-4.4</b> | <0.0001 | **** | 0.0092 |
|               | tumor  | 14.542 | 23857.166    |      |             |         |      |        |
| <b>FN1</b>    | normal | 19.485 | 734004.087   | 0.5  | <b>-1.9</b> | 0.0005  | **   | 0.0450 |
|               | tumor  | 18.585 | 393101.896   |      |             |         |      |        |
| <b>FOXC2</b>  | normal | 12.487 | 5740.770     | 0.1  | <b>-7.4</b> | 0.0004  | ***  | 0.0361 |
|               | tumor  | 9.591  | 771.094      |      |             |         |      |        |
| <b>FST</b>    | normal | 14.996 | 32677.274    | 0.3  | <b>-3.1</b> | 0.0027  | *    | 0.2202 |
|               | tumor  | 13.341 | 10378.578    |      |             |         |      |        |
| <b>GAPDH</b>  | normal | 23.141 | 9248943.477  | 3.3  | <b>3.3</b>  | <0.0001 | **** | 0.0092 |
|               | tumor  | 24.852 | 30278073.390 |      |             |         |      |        |
| <b>GRN</b>    | normal | 20.833 | 1868103.370  | 2.2  | <b>2.2</b>  | <0.0001 | **** | 0.0092 |
|               | tumor  | 21.985 | 4150920.873  |      |             |         |      |        |
| <b>GUSB</b>   | normal | 18.738 | 437133.460   | 1.3  | <b>1.3</b>  | 0.0026  | *    | 0.2130 |
|               | tumor  | 19.099 | 561562.702   |      |             |         |      |        |
| <b>HEY1</b>   | normal | 15.225 | 38302.285    | 1.9  | <b>1.9</b>  | 0.0135  | *    | 0.7136 |
|               | tumor  | 16.124 | 71419.620    |      |             |         |      |        |
| <b>HGF</b>    | normal | 14.429 | 22055.596    | 0.1  | <b>-7.2</b> | 0.0049  | **   | 0.3636 |
|               | tumor  | 11.571 | 3042.247     |      |             |         |      |        |
| <b>HPRT1</b>  | normal | 18.324 | 328215.925   | 1.6  | <b>1.6</b>  | <0.0001 | **** | 0.0092 |
|               | tumor  | 18.972 | 514135.221   |      |             |         |      |        |
| <b>HSPG2</b>  | normal | 18.820 | 462790.589   | 0.6  | <b>-1.8</b> | <0.0001 | **** | 0.0092 |
|               | tumor  | 17.982 | 258976.830   |      |             |         |      |        |
| <b>IFNB1</b>  | normal | 2.488  | 5.611        | 3.0  | <b>3.0</b>  | 0.8040  | ns   | 1.0000 |
|               | tumor  | 4.072  | 16.824       |      |             |         |      |        |
| <b>IFNG</b>   | normal | 8.361  | 328.765      | 3.7  | <b>3.7</b>  | 0.8117  | ns   | 1.0000 |
|               | tumor  | 10.258 | 1224.777     |      |             |         |      |        |
| <b>IL12A</b>  | normal | 13.049 | 8472.497     | 0.5  | <b>-2.1</b> | 0.0059  | **   | 0.4198 |
|               | tumor  | 11.978 | 4032.885     |      |             |         |      |        |
| <b>ITGA4</b>  | normal | 13.497 | 11562.317    | 1.0  | <b>1.0</b>  | 0.6705  | ns   | 1.0000 |
|               | tumor  | 13.553 | 12019.608    |      |             |         |      |        |
| <b>ITGAV</b>  | normal | 18.555 | 385171.880   | 0.5  | <b>-2.0</b> | <0.0001 | **** | 0.0092 |
|               | tumor  | 17.559 | 193137.673   |      |             |         |      |        |
| <b>ITGB3</b>  | normal | 14.869 | 29926.643    | 0.3  | <b>-3.8</b> | <0.0001 | **** | 0.0092 |
|               | tumor  | 12.935 | 7830.747     |      |             |         |      |        |
| <b>KDR</b>    | normal | 17.923 | 248544.191   | 0.2  | <b>-4.5</b> | <0.0001 | **** | 0.0092 |
|               | tumor  | 15.749 | 55062.305    |      |             |         |      |        |
| <b>KIT</b>    | normal | 15.574 | 48770.268    | 0.3  | <b>-3.1</b> | 0.0027  | **   | 0.2202 |
|               | tumor  | 13.920 | 15500.503    |      |             |         |      |        |
| <b>LEP</b>    | normal | 7.345  | 162.618      | 0.5  | <b>-1.8</b> | 0.4977  | ns   | 1.0000 |
|               | tumor  | 6.459  | 87.976       |      |             |         |      |        |
| <b>LYVE1</b>  | normal | 15.873 | 60031.353    | 0.1  | <b>-8.1</b> | <0.0001 | **** | 0.0092 |
|               | tumor  | 12.852 | 7395.362     |      |             |         |      |        |
| <b>MDK</b>    | normal | 21.547 | 3063728.752  | 2.8  | <b>2.8</b>  | <0.0001 | **** | 0.0092 |
|               | tumor  | 23.034 | 8587542.294  |      |             |         |      |        |
| <b>MMP2</b>   | normal | 20.978 | 2065005.632  | 0.5  | <b>-2.1</b> | 0.1601  | ns   | 1.0000 |
|               | tumor  | 19.933 | 1000658.484  |      |             |         |      |        |
| <b>NRP1</b>   | normal | 18.221 | 305630.410   | 0.4  | <b>-2.7</b> | <0.0001 | **** | 0.0092 |
|               | tumor  | 16.798 | 113950.478   |      |             |         |      |        |
| <b>NRP2</b>   | normal | 17.681 | 210203.705   | 0.4  | <b>-2.7</b> | <0.0001 | **** | 0.0092 |
|               | tumor  | 16.244 | 77609.283    |      |             |         |      |        |
| <b>PDGFB</b>  | normal | 17.273 | 158392.320   | 0.8  | <b>-1.3</b> | 0.0709  | ns   | 0.9988 |
|               | tumor  | 16.946 | 126233.030   |      |             |         |      |        |
| <b>PDGFRA</b> | normal | 17.943 | 251963.834   | 0.1  | <b>-7.8</b> | <0.0001 | **** | 0.0092 |
|               | tumor  | 14.981 | 32335.355    |      |             |         |      |        |
| <b>PDGFRB</b> | normal | 19.571 | 778934.697   | 0.3  | <b>-3.5</b> | <0.0001 | **** | 0.0092 |
|               | tumor  | 17.759 | 221870.958   |      |             |         |      |        |
| <b>PECAM1</b> | normal | 18.770 | 447026.242   | 0.5  | <b>-2.2</b> | 0.0060  | **   | 0.4252 |
|               | tumor  | 17.655 | 206348.908   |      |             |         |      |        |
| <b>PF4</b>    | normal | 8.441  | 347.573      | 1.3  | <b>1.3</b>  | 0.9240  | ns   | 1.0000 |
|               | tumor  | 8.780  | 439.655      |      |             |         |      |        |
| <b>PLG</b>    | normal | 9.464  | 706.443      | 0.4  | <b>-2.4</b> | 0.0006  | ***  | 0.0537 |
|               | tumor  | 8.179  | 289.783      |      |             |         |      |        |
| <b>PRL</b>    | normal | 9.380  | 666.353      | 0.8  | <b>-1.2</b> | 0.9854  | ns   | 1.0000 |
|               | tumor  | 9.123  | 557.511      |      |             |         |      |        |
| <b>PROK1</b>  | normal | 10.540 | 1488.603     | 0.4  | <b>-2.5</b> | 0.7928  | ns   | 1.0000 |
|               | tumor  | 9.198  | 587.189      |      |             |         |      |        |

|                 |        |        |             |     |              |         |      |        |
|-----------------|--------|--------|-------------|-----|--------------|---------|------|--------|
| <i>PROX1</i>    | normal | 14.241 | 19368.553   | 0.2 | <b>-4.2</b>  | 0.0007  | ***  | 0.0624 |
|                 | tumor  | 12.187 | 4663.570    |     |              |         |      |        |
| <i>PTN</i>      | normal | 19.439 | 710688.162  | 0.2 | <b>-4.8</b>  | 0.0112  | *    | 0.6452 |
|                 | tumor  | 17.176 | 148033.656  |     |              |         |      |        |
| <i>S1PR1</i>    | normal | 18.052 | 271818.800  | 0.2 | <b>-4.1</b>  | <0.0001 | **** | 0.0092 |
|                 | tumor  | 16.031 | 66968.087   |     |              |         |      |        |
| <i>SEMA3F</i>   | normal | 17.583 | 196282.419  | 2.0 | <b>2.0</b>   | 0.0109  | *    | 0.6352 |
|                 | tumor  | 18.550 | 383743.030  |     |              |         |      |        |
| <i>SERPINB5</i> | normal | 10.203 | 1178.412    | 7.1 | <b>7.1</b>   | 0.0384  | *    | 0.9727 |
|                 | tumor  | 13.021 | 8310.591    |     |              |         |      |        |
| <i>SERPINC1</i> | normal | 9.437  | 693.139     | 1.2 | <b>1.2</b>   | 0.0228  | *    | 0.8802 |
|                 | tumor  | 9.700  | 831.528     |     |              |         |      |        |
| <i>SERPINF1</i> | normal | 21.185 | 2384786.316 | 0.2 | <b>-6.1</b>  | <0.0001 | **** | 0.0092 |
|                 | tumor  | 18.574 | 390110.120  |     |              |         |      |        |
| <i>TEK</i>      | normal | 17.063 | 136936.058  | 0.2 | <b>-5.1</b>  | 0.0003  | ***  | 0.0272 |
|                 | tumor  | 14.715 | 26886.578   |     |              |         |      |        |
| <i>TGFA</i>     | normal | 14.359 | 21006.838   | 3.8 | <b>3.8</b>   | 0.0003  | ***  | 0.0272 |
|                 | tumor  | 16.301 | 80712.861   |     |              |         |      |        |
| <i>TGFB1</i>    | normal | 18.861 | 476084.173  | 0.7 | <b>-1.5</b>  | 0.0035  | **   | 0.2757 |
|                 | tumor  | 18.276 | 317385.328  |     |              |         |      |        |
| <i>THBS1</i>    | normal | 20.091 | 1117178.723 | 0.2 | <b>-5.2</b>  | <0.0001 | **** | 0.0092 |
|                 | tumor  | 17.707 | 213909.694  |     |              |         |      |        |
| <i>THBS2</i>    | normal | 18.506 | 372272.623  | 0.2 | <b>-4.5</b>  | <0.0001 | **** | 0.0092 |
|                 | tumor  | 16.343 | 83126.981   |     |              |         |      |        |
| <i>TIE1</i>     | normal | 17.787 | 226140.073  | 0.3 | <b>-3.4</b>  | 0.0002  | ***  | 0.0182 |
|                 | tumor  | 16.035 | 67163.194   |     |              |         |      |        |
| <i>TIMP2</i>    | normal | 21.578 | 3131203.221 | 0.2 | <b>-5.0</b>  | <0.0001 | **** | 0.0092 |
|                 | tumor  | 19.246 | 621943.223  |     |              |         |      |        |
| <i>TIMP3</i>    | normal | 15.705 | 53421.870   | 0.1 | <b>-13.6</b> | <0.0001 | **** | 0.0092 |
|                 | tumor  | 11.940 | 3927.894    |     |              |         |      |        |
| <i>TNF</i>      | normal | 12.937 | 7844.608    | 4.1 | <b>4.1</b>   | 0.2861  | ns   | 1.0000 |
|                 | tumor  | 14.957 | 31798.550   |     |              |         |      |        |
| <i>TNFSF15</i>  | normal | 12.790 | 7080.887    | 2.5 | <b>2.5</b>   | 0.0980  | ns   | 0.9999 |
|                 | tumor  | 14.106 | 17628.212   |     |              |         |      |        |
| <i>TNMD</i>     | normal | 10.790 | 1770.783    | 0.1 | <b>-12.7</b> | 0.0163  | *    | 0.7795 |
|                 | tumor  | 7.127  | 139.797     |     |              |         |      |        |
| <i>TNNI1</i>    | normal | 12.152 | 4552.183    | 2.7 | <b>2.7</b>   | 0.0060  | **   | 0.4252 |
|                 | tumor  | 13.595 | 12370.755   |     |              |         |      |        |
| <i>TYMP</i>     | normal | 16.785 | 112958.129  | 3.4 | <b>3.4</b>   | 0.0484  | *    | 0.9896 |
|                 | tumor  | 18.556 | 385435.889  |     |              |         |      |        |
| <i>VASH1</i>    | normal | 16.613 | 100243.062  | 0.5 | <b>-1.9</b>  | <0.0001 | **** | 0.0092 |
|                 | tumor  | 15.658 | 51721.819   |     |              |         |      |        |
| <i>VEGFA</i>    | normal | 17.265 | 157547.635  | 1.5 | <b>1.5</b>   | 0.0049  | **   | 0.3636 |
|                 | tumor  | 17.896 | 243967.951  |     |              |         |      |        |
| <i>VEGFB</i>    | normal | 20.491 | 1473542.400 | 0.9 | <b>-1.1</b>  | 0.7202  | ns   | 1.0000 |
|                 | tumor  | 20.405 | 1388565.916 |     |              |         |      |        |
| <i>VEGFC</i>    | normal | 17.635 | 203486.200  | 0.4 | <b>-2.6</b>  | 0.0001  | ***  | 0.0092 |
|                 | tumor  | 16.248 | 77807.831   |     |              |         |      |        |

†Wilcoxon matched-pairs signed rank test; ‡ Bonferroni-Šidák corrections for multiple comparisons

**Table S2:** Normalized levels of angiogenesis-associated proteins in endometrial cancer tissues and adjacent control tissues (n= up to 527). Data are from the CPTAC UCEC Discovery Study – Proteome, PDC ID: PDC000125 [2]. FC, fold change; FR, fold-regulation.

| PROTEIN | tissue | AVERAGE<br>(log2 value) | PROTEIN LEVEL<br>(antilog value) | FC<br>(tumor/n<br>ormal) | FR<br>(tumor/norm<br>al) | P-VALUE† |      | Adjusted p value‡ |
|---------|--------|-------------------------|----------------------------------|--------------------------|--------------------------|----------|------|-------------------|
| ADAMTS1 | normal | 0.099                   | 1.071                            | 1.0                      | 1.0                      | 0.1974   | ns   | 1.0000            |
|         | tumor  | 0.122                   | 1.088                            |                          |                          |          |      |                   |
| AMOT    | normal | 0.314                   | 1.243                            | 0.8                      | -1.3                     | 0.0150   | *    | 0.6141            |
|         | tumor  | -0.068                  | 0.954                            |                          |                          |          |      |                   |
| ANGPT2  | normal | 0.077                   | 1.055                            | 1.0                      | -1.0                     | 0.9530   | ns   | 1.0000            |
|         | tumor  | 0.038                   | 1.027                            |                          |                          |          |      |                   |
| ANGPT4  | normal | /                       | /                                | /                        | /                        | /        |      |                   |
|         | tumor  | -0.457                  | 0.729                            |                          |                          |          |      |                   |
| ANGPTL1 | normal | 0.606                   | 1.522                            | 0.6                      | -1.8                     | 0.1094   | ns   | 0.9993            |
|         | tumor  | -0.247                  | 0.843                            |                          |                          |          |      |                   |
| ANGPTL2 | normal | 1.273                   | 2.417                            | 0.3                      | -3.0                     | <0.0001  | **** | 0.0063            |
|         | tumor  | -0.309                  | 0.807                            |                          |                          |          |      |                   |
| ANGPTL4 | normal | 0.045                   | 1.032                            | 1.0                      | 1.0                      | 0.0210   | *    | 0.7374            |
|         | tumor  | 0.073                   | 1.052                            |                          |                          |          |      |                   |
| CD44    | normal | 0.053                   | 1.037                            | 0.9                      | -1.1                     | 0.6231   | ns   | 1.0000            |
|         | tumor  | -0.078                  | 0.947                            |                          |                          |          |      |                   |
| CDH5    | normal | 0.575                   | 1.489                            | 0.5                      | -1.9                     | <0.0001  | **** | 0.0063            |
|         | tumor  | -0.366                  | 0.776                            |                          |                          |          |      |                   |
| CEACAM1 | normal | -0.366                  | 0.776                            | 1.4                      | 1.4                      | <0.0001  | **** | 0.0063            |
|         | tumor  | 0.122                   | 1.088                            |                          |                          |          |      |                   |
| CHGA    | normal | -0.031                  | 0.979                            | 1.6                      | 1.6                      | 0.1074   | ns   | 0.9992            |
|         | tumor  | 0.618                   | 1.534                            |                          |                          |          |      |                   |
| COL15A1 | normal | 2.227                   | 4.681                            | 0.2                      | -6.2                     | <0.0001  | **** | 0.0063            |
|         | tumor  | -0.404                  | 0.756                            |                          |                          |          |      |                   |
| COL18A1 | normal | 1.528                   | 2.884                            | 0.3                      | -3.5                     | <0.0001  | **** | 0.0063            |
|         | tumor  | -0.265                  | 0.832                            |                          |                          |          |      |                   |
| COL4A1  | normal | 0.808                   | 1.751                            | 0.4                      | -2.3                     | <0.0001  | **** | 0.0063            |
|         | tumor  | -0.364                  | 0.777                            |                          |                          |          |      |                   |
| COL4A2  | normal | 0.484                   | 1.399                            | 0.6                      | -1.8                     | <0.0001  | **** | 0.0063            |
|         | tumor  | -0.324                  | 0.799                            |                          |                          |          |      |                   |
| CTGF    | normal | 0.447                   | 1.363                            | 0.7                      | -1.5                     | 0.0031   | **   | 0.1777            |
|         | tumor  | -0.100                  | 0.933                            |                          |                          |          |      |                   |
| CXCL10  | normal | -0.106                  | 0.929                            | 1.3                      | 1.3                      | 0.0391   | *    | 0.9190            |
|         | tumor  | 0.226                   | 1.170                            |                          |                          |          |      |                   |
| CXCL12  | normal | 2.612                   | 6.112                            | 0.1                      | -8.2                     | <0.0001  | **** | 0.0063            |
|         | tumor  | -0.427                  | 0.744                            |                          |                          |          |      |                   |
| CXCL8   | normal | -0.274                  | 0.827                            | 1.6                      | 1.6                      | 0.0457   | *    | 0.9475            |
|         | tumor  | 0.406                   | 1.325                            |                          |                          |          |      |                   |
| EDIL3   | normal | 0.590                   | 1.505                            | 0.6                      | -1.6                     | 0.0034   | **   | 0.1931            |
|         | tumor  | -0.088                  | 0.941                            |                          |                          |          |      |                   |
| ENPP2   | normal | 0.826                   | 1.773                            | 0.4                      | -2.3                     | <0.0001  | **** | 0.0063            |
|         | tumor  | -0.397                  | 0.760                            |                          |                          |          |      |                   |
| EPHB2   | normal | -0.229                  | 0.853                            | 1.2                      | 1.2                      | 0.0395   | *    | 0.9211            |
|         | tumor  | -0.022                  | 0.985                            |                          |                          |          |      |                   |
| FBLN5   | normal | 1.463                   | 2.757                            | 0.2                      | -4.0                     | <0.0001  | **** | 0.0063            |
|         | tumor  | -0.553                  | 0.682                            |                          |                          |          |      |                   |
| FGA     | normal | 0.377                   | 1.298                            | 0.6                      | -1.6                     | 0.0035   | **   | 0.1982            |
|         | tumor  | -0.289                  | 0.819                            |                          |                          |          |      |                   |
| FGF1    | normal | 0.505                   | 1.419                            | 0.6                      | -1.6                     | <0.0001  | **** | 0.0063            |
|         | tumor  | -0.187                  | 0.879                            |                          |                          |          |      |                   |
| FGF2    | normal | 2.263                   | 4.800                            | 0.1                      | -7.4                     | <0.0001  | **** | 0.0063            |
|         | tumor  | -0.617                  | 0.652                            |                          |                          |          |      |                   |
| FGF4    | normal | -0.292                  | 0.817                            | 1.8                      | 1.8                      | 0.2500   | ns   | 1.0000            |
|         | tumor  | 0.564                   | 1.478                            |                          |                          |          |      |                   |
| FLT1    | normal | 0.533                   | 1.447                            | 0.6                      | -1.6                     | <0.0001  | **** | 0.0063            |
|         | tumor  | -0.113                  | 0.925                            |                          |                          |          |      |                   |
| FN1     | normal | 0.464                   | 1.379                            | 0.6                      | -1.6                     | 0.0211   | *    | 0.7391            |
|         | tumor  | -0.222                  | 0.857                            |                          |                          |          |      |                   |

|          |        |        |       |     |      |         |      |        |
|----------|--------|--------|-------|-----|------|---------|------|--------|
| FST      | normal | 1.556  | 2.940 | 0.2 | -4.8 | <0.0001 | **** | 0.0063 |
|          | tumor  | -0.707 | 0.613 |     |      |         |      |        |
| GRN      | normal | -0.307 | 0.808 | 1.4 | 1.4  | <0.0001 | **** | 0.0063 |
|          | tumor  | 0.167  | 1.122 |     |      |         |      |        |
| HGF      | normal | 1.377  | 2.597 | 0.3 | -3.7 | <0.0001 | **** | 0.0063 |
|          | tumor  | -0.494 | 0.710 |     |      |         |      |        |
| HSPG2    | normal | 1.611  | 3.055 | 0.3 | -3.7 | <0.0001 | **** | 0.0063 |
|          | tumor  | -0.265 | 0.832 |     |      |         |      |        |
| ITGA4    | normal | -0.023 | 0.984 | 1.1 | 1.1  | 0.0965  | ns   | 0.9983 |
|          | tumor  | 0.070  | 1.050 |     |      |         |      |        |
| ITGAV    | normal | -0.277 | 0.825 | 1.1 | 1.1  | 0.0087  | **   | 0.4233 |
|          | tumor  | -0.079 | 0.946 |     |      |         |      |        |
| ITGB3    | normal | 0.156  | 1.115 | 0.8 | -1.2 | 0.3165  | ns   | 1.0000 |
|          | tumor  | -0.155 | 0.898 |     |      |         |      |        |
| LEP      | normal | 0.485  | 1.399 | 0.6 | -1.6 | 0.0938  | ns   | 0.9980 |
|          | tumor  | -0.191 | 0.876 |     |      |         |      |        |
| LYVE1    | normal | 1.286  | 2.439 | 0.3 | -3.2 | <0.0001 | **** | 0.0063 |
|          | tumor  | -0.371 | 0.773 |     |      |         |      |        |
| MDK      | normal | -0.081 | 0.946 | 1.2 | 1.2  | 0.0048  | **   | 0.2615 |
|          | tumor  | 0.190  | 1.141 |     |      |         |      |        |
| MMP2     | normal | 0.741  | 1.672 | 0.5 | -2.2 | 0.0001  | ***  | 0.0063 |
|          | tumor  | -0.382 | 0.767 |     |      |         |      |        |
| NRP1     | normal | 0.245  | 1.185 | 0.7 | -1.5 | <0.0001 | **** | 0.0063 |
|          | tumor  | -0.373 | 0.772 |     |      |         |      |        |
| NRP2     | normal | 0.260  | 1.198 | 0.8 | -1.3 | 0.0604  | ns   | 0.9803 |
|          | tumor  | -0.090 | 0.940 |     |      |         |      |        |
| PDGFRA   | normal | 0.826  | 1.773 | 0.4 | -2.6 | 0.0313  | *    | 0.8651 |
|          | tumor  | -0.557 | 0.680 |     |      |         |      |        |
| PDGFRB   | normal | 0.831  | 1.779 | 0.4 | -2.3 | <0.0001 | **** | 0.0063 |
|          | tumor  | -0.361 | 0.779 |     |      |         |      |        |
| PECAM1   | normal | 0.551  | 1.465 | 0.5 | -1.8 | 0.0001  | ***  | 0.0063 |
|          | tumor  | -0.312 | 0.806 |     |      |         |      |        |
| PF4      | normal | 0.311  | 1.241 | 0.8 | -1.3 | 0.3449  | ns   | 1.0000 |
|          | tumor  | -0.093 | 0.938 |     |      |         |      |        |
| PLG      | normal | 1.096  | 2.137 | 0.3 | -3.1 | <0.0001 | **** | 0.0063 |
|          | tumor  | -0.517 | 0.699 |     |      |         |      |        |
| PROX1    | normal | -0.265 | 0.832 | 1.3 | 1.3  | 0.4037  | ns   | 1.0000 |
|          | tumor  | 0.062  | 1.044 |     |      |         |      |        |
| PTN      | normal | 2.035  | 4.097 | 0.2 | -6.4 | <0.0001 | **** | 0.0063 |
|          | tumor  | -0.646 | 0.639 |     |      |         |      |        |
| RNASE4   | normal | 1.610  | 3.053 | 0.3 | -3.5 | <0.0001 | **** | 0.0063 |
|          | tumor  | -0.199 | 0.871 |     |      |         |      |        |
| SEMA3F   | normal | -0.193 | 0.875 | 1.2 | 1.2  | 0.0313  | *    | 0.8651 |
|          | tumor  | 0.121  | 1.087 |     |      |         |      |        |
| SERPINB5 | normal | -0.183 | 0.881 | 1.7 | 1.7  | 0.0691  | ns   | 0.9890 |
|          | tumor  | 0.571  | 1.486 |     |      |         |      |        |
| SERPINC1 | normal | 1.913  | 3.766 | 0.2 | -5.3 | <0.0001 | **** | 0.0063 |
|          | tumor  | -0.487 | 0.713 |     |      |         |      |        |
| SERPINF1 | normal | 1.399  | 2.637 | 0.3 | -3.3 | <0.0001 | **** | 0.0063 |
|          | tumor  | -0.329 | 0.796 |     |      |         |      |        |
| TGFA     | normal | 0.394  | 1.314 | 0.6 | -1.5 | 0.9999  | ns   | 1.0000 |
|          | tumor  | -0.236 | 0.849 |     |      |         |      |        |
| TGFB1    | normal | 0.162  | 1.119 | 0.8 | -1.3 | 0.0025  | **   | 0.1459 |
|          | tumor  | -0.184 | 0.880 |     |      |         |      |        |
| THBS1    | normal | 0.428  | 1.345 | 0.7 | -1.4 | 0.2799  | ns   | 1.0000 |
|          | tumor  | -0.014 | 0.991 |     |      |         |      |        |
| THBS2    | normal | 0.489  | 1.404 | 0.7 | -1.4 | 0.0025  | **   | 0.1459 |
|          | tumor  | -0.043 | 0.970 |     |      |         |      |        |
| TIMP2    | normal | 1.088  | 2.126 | 0.4 | -2.7 | <0.0001 | **** | 0.0063 |
|          | tumor  | -0.367 | 0.775 |     |      |         |      |        |
| TIMP3    | normal | 2.170  | 4.499 | 0.2 | -5.6 | <0.0001 | **** | 0.0063 |
|          | tumor  | -0.325 | 0.798 |     |      |         |      |        |
| TYMP     | normal | -0.807 | 0.572 | 2.3 | 2.3  | <0.0001 | **** | 0.0063 |
|          | tumor  | 0.412  | 1.331 |     |      |         |      |        |
| VASH1    | normal | -0.011 | 0.993 | 1.0 | 1.0  | 0.9515  | ns   | 1.0000 |
|          | tumor  | 0.058  | 1.041 |     |      |         |      |        |

|       |        |        |              |     |             |               |    |        |
|-------|--------|--------|--------------|-----|-------------|---------------|----|--------|
| VEGFA | normal | -0.271 | <b>0.829</b> | 1.2 | <b>1.2</b>  | <b>0.1424</b> | ns | 0.9999 |
|       | tumor  | 0.004  | <b>1.003</b> |     |             |               |    |        |
| VEGFB | normal | 0.513  | <b>1.427</b> | 0.7 | <b>-1.4</b> | <b>0.0313</b> | *  | 0.8651 |
|       | tumor  | -0.012 | <b>0.992</b> |     |             |               |    |        |

†Wilcoxon matched-pairs signed rank test; ‡ Bonferroni-Šidák corrections for multiple comparisons

**Table S3:** Expression of angiogenesis-associated genes in endometrial cancer tissue (n= up to 527). Data are from the TCGA Pan-Cancer study [3].

| Gene            | mRNA expression, RSEM<br>(Batch normalized from<br>Illumina<br>HiSeq_RNASeqV2) | SD       | Gene            | mRNA expression, RSEM<br>(Batch normalized from<br>Illumina<br>HiSeq_RNASeqV2) | SD     |
|-----------------|--------------------------------------------------------------------------------|----------|-----------------|--------------------------------------------------------------------------------|--------|
| <i>MDK</i>      | 18267.75                                                                       | 14206.90 | <i>TIE1</i>     | 395.18                                                                         | 351.54 |
| <i>COL18A1</i>  | 16148.50                                                                       | 11747.65 | <i>KDR</i>      | 390.16                                                                         | 342.72 |
| <i>COL4A2</i>   | 12913.68                                                                       | 8832.25  | <i>ANGPT2</i>   | 386.21                                                                         | 350.38 |
| <i>GRN</i>      | 12674.28                                                                       | 7719.52  | <i>S1PR1</i>    | 250.72                                                                         | 221.36 |
| <i>FN1</i>      | 10472.11                                                                       | 19006.95 | <i>ITGA4</i>    | 237.83                                                                         | 296.47 |
| <i>HSPG2</i>    | 9320.44                                                                        | 6691.21  | <i>ANG</i>      | 235.19                                                                         | 258.93 |
| <i>COL4A1</i>   | 8674.58                                                                        | 7144.93  | <i>FLT4</i>     | 198.86                                                                         | 165.24 |
| <i>MMP2</i>     | 7478.64                                                                        | 8846.14  | <i>ITGB3</i>    | 189.88                                                                         | 546.20 |
| <i>CD44</i>     | 4761.79                                                                        | 7723.18  | <i>VEGFC</i>    | 181.54                                                                         | 154.98 |
| <i>TIMP2</i>    | 4469.03                                                                        | 3400.49  | <i>CXCL2</i>    | 179.02                                                                         | 351.07 |
| <i>VEGFA</i>    | 3642.50                                                                        | 2980.86  | <i>KIT</i>      | 157.84                                                                         | 284.90 |
| <i>CHGA</i>     | 3347.87                                                                        | 13011.92 | <i>TEK</i>      | 143.39                                                                         | 159.57 |
| <i>CCN2</i>     | 3099.48                                                                        | 3530.17  | <i>SERPINB5</i> | 136.73                                                                         | 307.67 |
| <i>ITGAV</i>    | 2241.80                                                                        | 1577.89  | <i>FGF2</i>     | 127.44                                                                         | 175.78 |
| <i>THBS1</i>    | 2221.83                                                                        | 2725.16  | <i>TNF</i>      | 127.01                                                                         | 254.38 |
| <i>ADAMTS1</i>  | 1933.68                                                                        | 2453.26  | <i>CSF3</i>     | 120.73                                                                         | 606.01 |
| <i>PDGFRB</i>   | 1865.27                                                                        | 1670.35  | <i>TNNI1</i>    | 94.68                                                                          | 144.80 |
| <i>SEMA3F</i>   | 1814.86                                                                        | 1550.70  | <i>ANGPTL1</i>  | 78.98                                                                          | 188.42 |
| <i>TIMP3</i>    | 1811.47                                                                        | 2514.89  | <i>FGF1</i>     | 77.94                                                                          | 89.96  |
| <i>NRP1</i>     | 1686.45                                                                        | 1357.42  | <i>EDIL3</i>    | 57.34                                                                          | 82.69  |
| <i>VEGFB</i>    | 1618.82                                                                        | 949.99   | <i>ANGPT1</i>   | 46.48                                                                          | 181.63 |
| <i>SERPINF1</i> | 1611.30                                                                        | 1804.28  | <i>FST</i>      | 42.82                                                                          | 132.45 |
| <i>TYMP</i>     | 1293.09                                                                        | 1450.48  | <i>ADGRB1</i>   | 42.79                                                                          | 119.20 |
| <i>NRP2</i>     | 1089.81                                                                        | 1191.26  | <i>COL4A3</i>   | 36.83                                                                          | 153.65 |
| <i>FBLN5</i>    | 1080.58                                                                        | 1195.57  | <i>PROX1</i>    | 36.57                                                                          | 132.80 |
| <i>COL15A1</i>  | 1077.84                                                                        | 1153.32  | <i>LYVE1</i>    | 29.87                                                                          | 26.20  |
| <i>AMOT</i>     | 1054.77                                                                        | 1195.04  | <i>FGA</i>      | 22.54                                                                          | 132.17 |
| <i>CEACAM1</i>  | 967.82                                                                         | 1031.49  | <i>TNFSF15</i>  | 20.68                                                                          | 25.90  |
| <i>FLT1</i>     | 918.18                                                                         | 723.83   | <i>IL12A</i>    | 19.09                                                                          | 43.44  |
| <i>ENPP2</i>    | 820.21                                                                         | 1093.42  | <i>HGF</i>      | 17.60                                                                          | 45.26  |
| <i>TGFB1</i>    | 810.16                                                                         | 646.44   | <i>TNMD</i>     | 15.53                                                                          | 234.67 |
| <i>THBS2</i>    | 754.77                                                                         | 1132.91  | <i>PLG</i>      | 13.60                                                                          | 84.03  |
| <i>PECAM1</i>   | 730.22                                                                         | 562.79   | <i>F2</i>       | 11.62                                                                          | 87.36  |
| <i>ANGPTL2</i>  | 718.82                                                                         | 582.33   | <i>IFNG</i>     | 10.78                                                                          | 34.88  |
| <i>ANGPTL4</i>  | 715.81                                                                         | 1180.25  | <i>CNMD</i>     | 9.33                                                                           | 59.13  |
| <i>PDGFRA</i>   | 674.74                                                                         | 1096.33  | <i>PROK1</i>    | 6.59                                                                           | 21.46  |
| <i>TGFA</i>     | 655.51                                                                         | 797.61   | <i>VEGFD</i>    | 6.31                                                                           | 13.08  |
| <i>EPHB2</i>    | 645.82                                                                         | 729.06   | <i>PRL</i>      | 5.63                                                                           | 35.03  |
| <i>CDH5</i>     | 602.33                                                                         | 481.09   | <i>FOXC2</i>    | 5.45                                                                           | 13.20  |
| <i>CXCL10</i>   | 545.38                                                                         | 903.37   | <i>PF4</i>      | 3.93                                                                           | 11.92  |
| <i>CXCL12</i>   | 540.60                                                                         | 743.52   | <i>ANGPT4</i>   | 3.35                                                                           | 11.83  |
| <i>PTN</i>      | 529.22                                                                         | 1027.89  | <i>SERPINC1</i> | 2.57                                                                           | 9.40   |
| <i>PDGFB</i>    | 503.11                                                                         | 372.73   | <i>FGF4</i>     | 2.25                                                                           | 15.45  |
| <i>VASH1</i>    | 479.33                                                                         | 298.00   | <i>IFNB1</i>    | 1.52                                                                           | 5.15   |
| <i>CXCL8</i>    | 424.51                                                                         | 693.92   | <i>ANGPTL3</i>  | 1.10                                                                           | 2.94   |
| <i>RNASE4</i>   | 421.10                                                                         | 457.71   | <i>LEP</i>      | 0.91                                                                           | 2.55   |
| <i>HEY1</i>     | 408.30                                                                         | 640.72   |                 |                                                                                |        |

**Figure S1:** Volcano plots identifying significant changes in gene expression within the tumour and tumour-adjacent tissue separately, in EC patients stratified according to the presence of LVI or DMI, EC grade, FIGO stage, and menopausal status.

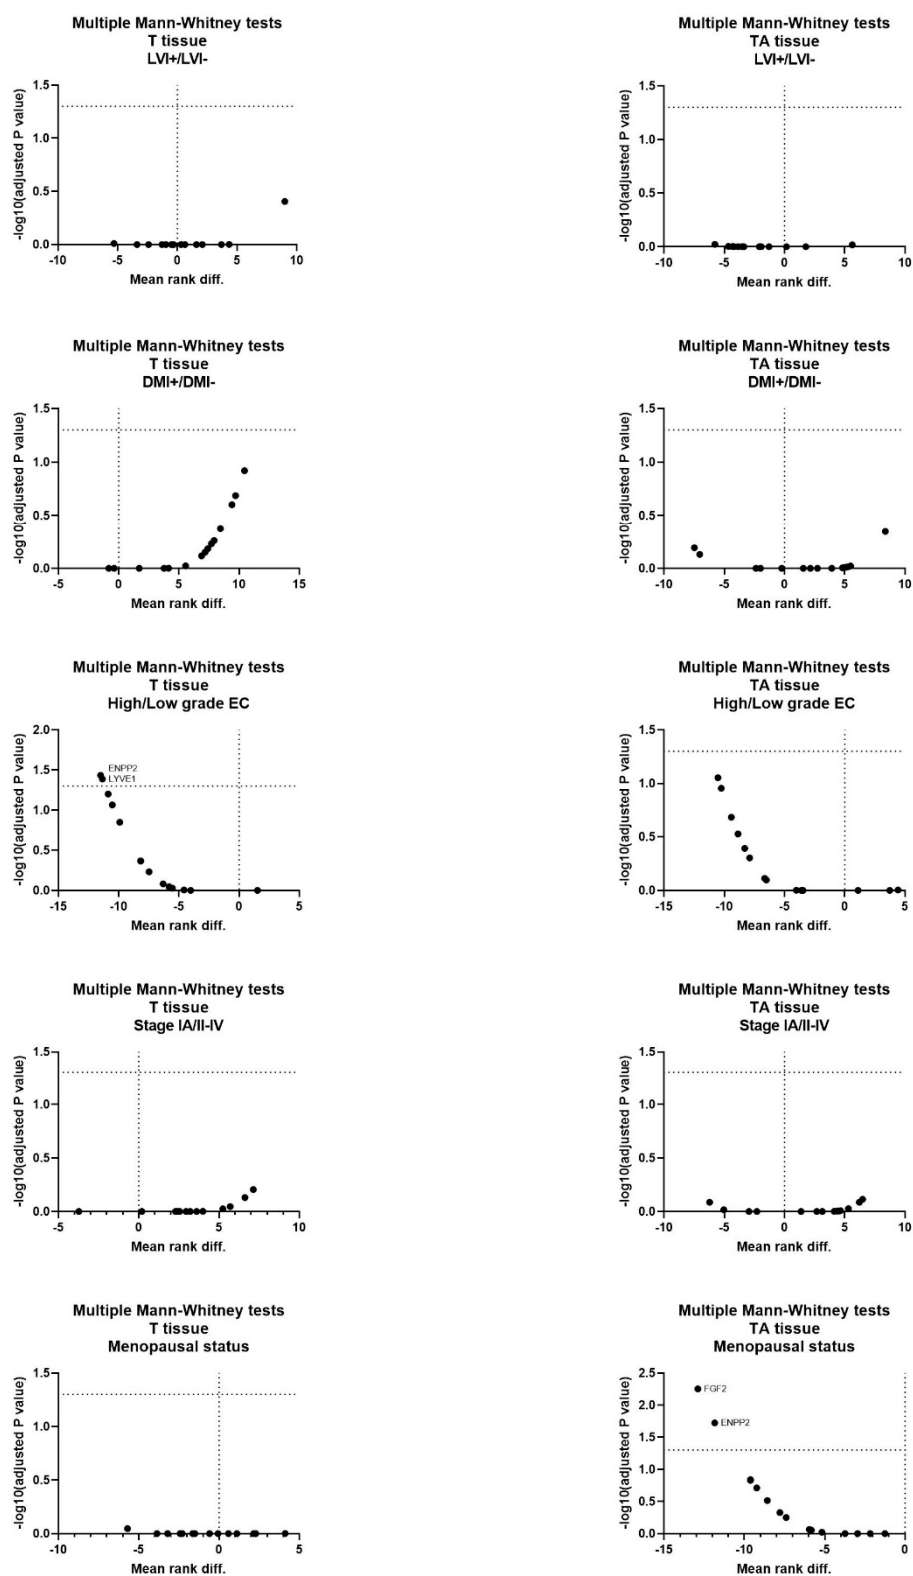



**Table S4:** The calculated distribution fit correlation with the original data, including the p-values and estimated upper and lower bounds for the 95% confidence intervals for the TCGA dataset. All results are significant at  $p < 0.001$ .

| DATA POINT | A        | B        | CORRELATION<br>COEFFICIENT | P-VALUE | LOWER<br>BOUND | UPPER<br>BOUND |
|------------|----------|----------|----------------------------|---------|----------------|----------------|
| T_IL8      | 0.865526 | 0.002878 | 0.905640                   | 0.0000  | 0.821542       | 0.951169       |
| T_CXCL12   | 0.794219 | 0.000954 | 0.789788                   | 0.0000  | 0.622871       | 0.887929       |
| T_FGF2     | 1.071074 | 0.000068 | 0.675944                   | 0.0000  | 0.446581       | 0.821948       |
| T_LEP      | 2.084855 | 0.000000 | 0.819681                   | 0.0000  | 0.672152       | 0.904610       |
| T_LYVE1    | 0.630536 | 0.000004 | 0.605505                   | 0.0001  | 0.345750       | 0.779062       |
| T_NRP1     | 1.581737 | 0.000020 | 0.830570                   | 0.0000  | 0.690435       | 0.910623       |
| T_TIMP2    | 1.476134 | 0.000019 | 0.847401                   | 0.0000  | 0.719050       | 0.919850       |
| T_TIMP3    | 0.666441 | 0.000051 | 0.778116                   | 0.0000  | 0.603981       | 0.881345       |
| T_CSF3     | 0.718792 | 0.000000 | 0.858897                   | 0.0000  | 0.738849       | 0.926106       |
| T_ENPP2    | 0.884903 | 0.000169 | 0.879080                   | 0.0000  | 0.774116       | 0.937001       |
| T_FBLN5    | 1.199094 | 0.000026 | 0.917302                   | 0.0000  | 0.842739       | 0.957330       |
| T_FST      | 0.642057 | 0.000000 | 0.768969                   | 0.0000  | 0.589314       | 0.876158       |
| T_PDGFRB   | 1.519883 | 0.000012 | 0.815921                   | 0.0000  | 0.665881       | 0.902526       |
| T_TEK      | 1.075751 | 0.000006 | 0.774892                   | 0.0000  | 0.598798       | 0.879520       |
| T_SERPINF1 | 1.082361 | 0.000075 | 0.912356                   | 0.0000  | 0.833721       | 0.954722       |
| TA_IL8     | 0.714176 | 0.001788 | 0.821890                   | 0.0000  | 0.675846       | 0.905833       |
| TA_CXCL12  | 2.376653 | 0.001271 | 0.955058                   | 0.0000  | 0.912992       | 0.977030       |
| TA_FGF2    | 2.363325 | 0.000102 | 0.927692                   | 0.0000  | 0.861822       | 0.962789       |
| TA_LEP     | 2.999550 | 0.000000 | 0.731613                   | 0.0000  | 0.530617       | 0.854710       |
| TA_LYVE1   | 1.505071 | 0.000004 | 0.920799                   | 0.0000  | 0.849141       | 0.959171       |
| TA_NRP1    | 4.049333 | 0.000015 | 0.871276                   | 0.0000  | 0.760402       | 0.932802       |
| TA_TIMP2   | 3.801149 | 0.000026 | 0.923189                   | 0.0000  | 0.853529       | 0.960427       |
| TA_TIMP3   | 2.644840 | 0.000046 | 0.987744                   | 0.0000  | 0.975896       | 0.993787       |

|                         |              |          |          |        |          |          |
|-------------------------|--------------|----------|----------|--------|----------|----------|
| <b>TA_CSF3</b>          | 0.53529<br>9 | 0.000001 | 0.646848 | 0.0000 | 0.404212 | 0.804432 |
| <b>TA_ENPP2</b>         | 2.01939<br>4 | 0.000241 | 0.957371 | 0.0000 | 0.917379 | 0.978225 |
| <b>TA_FBLN5</b>         | 3.35754<br>3 | 0.000027 | 0.974838 | 0.0000 | 0.950822 | 0.987203 |
| <b>TA_FST</b>           | 1.93315<br>2 | 0.000000 | 0.933093 | 0.0000 | 0.871816 | 0.965615 |
| <b>TA_PDGFRB</b>        | 7.52730<br>4 | 0.000006 | 0.945569 | 0.0000 | 0.895098 | 0.972114 |
| <b>TA_TEK</b>           | 3.54141<br>3 | 0.000004 | 0.956357 | 0.0000 | 0.915455 | 0.977702 |
| <b>TA_SERPINF<br/>1</b> | 5.22976<br>9 | 0.000047 | 0.945371 | 0.0000 | 0.894726 | 0.972011 |

**Table S5:** The calculated distribution fit correlation with the original data, including the p-values and estimated upper and lower bounds for the 95% confidence intervals for the study dataset. All results are significant at  $p < 0.001$ .

| DATA POINT      | A        | B            | CORRELATION<br>COEFFICIENT | P-VALUE | LOWER<br>BOUND | UPPER<br>BOUND |
|-----------------|----------|--------------|----------------------------|---------|----------------|----------------|
| T_IL8           | 0.689577 | 615.611904   | 0.733600                   | 0.0000  | 0.691516       | 0.770720       |
| T_CXCL12        | 0.982751 | 550.091291   | 0.746537                   | 0.0000  | 0.706152       | 0.782082       |
| T_FGF2          | 1.001729 | 127.220793   | 0.749339                   | 0.0000  | 0.709326       | 0.784539       |
| T_LEP           | 0.139387 | 9.920558     | 0.486866                   | 0.0000  | 0.418872       | 0.549431       |
| T_LYVE1         | 1.703864 | 17.531297    | 0.829551                   | 0.0000  | 0.800884       | 0.854424       |
| T_NRP1          | 1.862639 | 905.409032   | 0.874982                   | 0.0000  | 0.853343       | 0.893611       |
| T_TIMP2         | 2.115066 | 2112.948146  | 0.892638                   | 0.0000  | 0.873850       | 0.908764       |
| T_TIMP3         | 1.201862 | 1507.220707  | 0.728567                   | 0.0000  | 0.685833       | 0.766295       |
| T_CSF3          | 0.180336 | 669.781675   | 0.310728                   | 0.0000  | 0.231458       | 0.385899       |
| T_ENPP2         | 1.076607 | 761.844598   | 0.753251                   | 0.0000  | 0.713760       | 0.787968       |
| T_FBLN5         | 1.323874 | 816.222788   | 0.792192                   | 0.0000  | 0.758073       | 0.821987       |
| T_FST           | 0.314102 | 137.296118   | 0.493572                   | 0.0000  | 0.426123       | 0.555563       |
| T_PDGFBRB       | 1.851507 | 1007.434155  | 0.823138                   | 0.0000  | 0.793515       | 0.848870       |
| T_TEK           | 1.454318 | 98.592971    | 0.749232                   | 0.0000  | 0.709204       | 0.784445       |
| T_SERPINF1      | 1.210736 | 1330.840563  | 0.809321                   | 0.0000  | 0.777665       | 0.836883       |
| TA_IL8          | 0.489189 | 352.721598   | 0.701191                   | 0.0003  | 0.396924       | 0.866606       |
| TA_CXCL12       | 0.831011 | 9572.143563  | 0.941913                   | 0.0000  | 0.863030       | 0.975953       |
| TA_FGF2         | 6.445643 | 202.961500   | 0.985955                   | 0.0000  | 0.965830       | 0.994262       |
| TA_LEP          | 0.279601 | 11.188484    | 0.794556                   | 0.0000  | 0.560817       | 0.910991       |
| TA_LYVE1        | 1.050753 | 534.399004   | 0.825833                   | 0.0000  | 0.620146       | 0.925279       |
| TA_NRP1         | 3.446996 | 1012.546962  | 0.964297                   | 0.0000  | 0.914473       | 0.985319       |
| TA_TIMP2        | 1.590801 | 13860.605010 | 0.964402                   | 0.0000  | 0.914719       | 0.985362       |
| TA_TIMP3        | 1.238316 | 15977.840950 | 0.973597                   | 0.0000  | 0.936330       | 0.989173       |
| TA_CSF3         | 0.202173 | 1278.145710  | 0.730288                   | 0.0001  | 0.446001       | 0.880725       |
| TA_ENPP2        | 1.024887 | 4131.928738  | 0.943870                   | 0.0000  | 0.867463       | 0.976776       |
| TA_FBLN5        | 1.608749 | 2777.478876  | 0.977029                   | 0.0000  | 0.944471       | 0.990590       |
| TA_FST          | 0.999620 | 62.177321    | 0.899825                   | 0.0000  | 0.770538       | 0.957995       |
| TA_PDGFBRB      | 2.085009 | 2551.811220  | 0.973161                   | 0.0000  | 0.935300       | 0.988993       |
| TA_TEK          | 0.843587 | 999.543226   | 0.959695                   | 0.0000  | 0.903764       | 0.983403       |
| TA_SERPINF<br>1 | 1.832375 | 4023.756396  | 0.950340                   | 0.0000  | 0.882207       | 0.979493       |

**Table S6:** Comparison between the training and test datasets using the Wilcoxon Rank Sum Test. None of the variables is significantly different between the datasets.

| VARIABLE        | WILCOXON RANK SUM P-VALUE |    |
|-----------------|---------------------------|----|
| AGE             | 0.7711                    | ns |
| WEIGHT          | 0.7443                    | ns |
| GRADESUMMARY    | 0.1671                    | ns |
| R_IL8           | 0.5794                    | ns |
| R_CXCL12        | 0.9348                    | ns |
| R_FGF2          | 0.0735                    | ns |
| R_LEP           | 0.0920                    | ns |
| R_LYVE1         | 0.4293                    | ns |
| R_NRP1          | 0.5307                    | ns |
| R_TIMP2         | 0.4729                    | ns |
| R_TIMP3         | 0.7095                    | ns |
| R_CSF3          | 0.8345                    | ns |
| R_ENPP2         | 0.3881                    | ns |
| R_FBLN5         | 0.4729                    | ns |
| R_FST           | 0.4618                    | ns |
| R_PDGFRB        | 0.4729                    | ns |
| R_TEK           | 0.5072                    | ns |
| R_SERPINF1      | 0.3881                    | ns |
| T_IL8_NORM      | 0.9348                    | ns |
| T_CXCL12_NORM   | 0.7368                    | ns |
| T_FGF2_NORM     | 0.5671                    | ns |
| T_LEP_NORM      | 0.0855                    | ns |
| T_LYVE1_NORM    | 0.5671                    | ns |
| T_NRP1_NORM     | 0.7643                    | ns |
| T_TIMP2_NORM    | 0.4084                    | ns |
| T_TIMP3_NORM    | 0.2716                    | ns |
| T_CSF3_NORM     | 0.4508                    | ns |
| T_ENPP2_NORM    | 0.3684                    | ns |
| T_FBLN5_NORM    | 0.2878                    | ns |
| T_FST_NORM      | 0.1160                    | ns |
| T_PDGFRB_NORM   | 0.3132                    | ns |
| T_TEK_NORM      | 0.1817                    | ns |
| T_SERPINF1_NORM | 0.1877                    | ns |
| TA_IL8_NORM     | 0.5427                    | ns |
| TA_CXCL12_NORM  | 0.6562                    | ns |
| TA_FGF2_NORM    | 0.3132                    | ns |
| TA_LEP_NORM     | 0.0574                    | ns |
| TA_LYVE1_NORM   | 0.6173                    | ns |
| TA_NRP1_NORM    | 0.0827                    | ns |
| TA_TIMP2_NORM   | 0.1758                    | ns |
| TA_TIMP3_NORM   | 0.3588                    | ns |
| TA_CSF3_NORM    | 0.5919                    | ns |
| TA_ENPP2_NORM   | 0.6694                    | ns |
| TA_FBLN5_NORM   | 0.9204                    | ns |
| TA_FST_NORM     | 0.8062                    | ns |

|                  |        |    |
|------------------|--------|----|
| TA_PDGFRB_NORM   | 0.6562 | ns |
| TA_TEK_NORM      | 0.8203 | ns |
| TA_SERPINF1_NORM | 0.3684 | ns |
| R_IL8_NORM       | 0.9204 | ns |
| R_CXCL12_NORM    | 0.6046 | ns |
| R_FGF2_NORM      | 0.8203 | ns |
| R_LEP_NORM       | 0.9204 | ns |
| R_LYVE1_NORM     | 0.9493 | ns |
| R_NRP1_NORM      | 0.1001 | ns |
| R_TIMP2_NORM     | 0.5189 | ns |
| R_TIMP3_NORM     | 0.6694 | ns |
| R_CSF3_NORM      | 0.9638 | ns |
| R_ENPP2_NORM     | 0.2796 | ns |
| R_FBLN5_NORM     | 0.5548 | ns |
| R_FST_NORM       | 0.1486 | ns |
| R_PDGFRB_NORM    | 0.7922 | ns |
| R_TEK_NORM       | 0.1877 | ns |

## References

1. Goldman, M.J.; Craft, B.; Hastie, M.; Repčeka, K.; McDade, F.; Kamath, A.; Banerjee, A.; Luo, Y.; Rogers, D.; Brooks, A.N.; et al. *Visualizing and interpreting cancer genomics data via the Xena platform*. Nature Biotechnology, 2020. **38**(6): p. 675-678. DOI: 10.1038/s41587-020-0546-8.
2. Dou, Y.; Kawaler, E.A.; Cui Zhou, D.; Gritsenko, M.A.; Huang, C.; Blumenberg, L.; Karpova, A.; Petyuk, V.A.; Savage, S.R.; Satpathy, S.; et al. *Proteogenomic Characterization of Endometrial Carcinoma*. Cell, 2020. **180**(4): p. 729-748 e726. DOI: 10.1016/j.cell.2020.01.026.
3. Cancer Genome Atlas Research, N.; Weinstein, J.N.; Collisson, E.A.; Mills, G.B.; Shaw, K.R.; Ozenberger, B.A.; Ellrott, K.; Shmulevich, I.; Sander, C.; and Stuart, J.M. *The Cancer Genome Atlas Pan-Cancer analysis project*. Nat Genet, 2013. **45**(10): p. 1113-1120. DOI: 10.1038/ng.2764.
